# Supplementary material for: One-pot hydrodeoxygenation (HDO) of lignin monomers to C9 hydrocarbons co-catalysed by Ru/C and Nb2O5
Source: Royal Society of Chemistry journal article supplement (doi:10.1039/d0gc01692f), 2020-01-01
Supplement: d0gc01692f1.pdf [file d0gc01692f1.pdf]

## Supporting Information

# One-pot Hydrodeoxygenation (HDO) of Lignin Monomers to C9 Hydrocarbons co-catalysed by Ru/C and Nb<sub>2</sub>O<sub>5</sub>

Simin Li<sup>a,b</sup>, Baoyuan Liu<sup>a</sup>, Julianne Truong<sup>a</sup>, Zhongyang Luo<sup>\*,b</sup>, Peter C. Ford<sup>\*,a</sup>, Mahdi M. Abu-Omar<sup>\*,a</sup>

<sup>a</sup> Department of Chemistry & Biochemistry, University of California, Santa Barbara, Building 232, Santa Barbara, California, 93106-9510, United States

<sup>b</sup> State Key Laboratory of Clean Energy Utilization, Zhejiang University, Hangzhou, 310027, PR China.

## Contents

### Tables: 3

**Table S-1.** Time profile of co-catalyst system.

**Table S-2.** Catalyst recyclability test.

**Table S-3.** Reaction with cyclohexanol feedstock over Ru/C or Nb<sub>2</sub>O<sub>5</sub> alone.

### Figures: 9

**Figure S-1.** XRD pattern (left) and XPS analysis (right) of Nb<sub>2</sub>O<sub>5</sub> catalyst.

**Figure S-2.** SEM (a) and TEM (b) images of Nb<sub>2</sub>O<sub>5</sub> catalyst.

**Figure S-3.** NH<sub>3</sub>-TPD profile of different Nb<sub>2</sub>O<sub>5</sub> catalysts.

**Figure S-4.** <sup>1</sup>H NMR in the aliphatic region of the products obtained after DHE reactions in D<sub>2</sub>O/methanol-d<sub>4</sub>, D<sub>2</sub>O/MeOH and H<sub>2</sub>O/MeOH.

**Figure S-5.** <sup>2</sup>H NMR spectrum of products obtained from the reaction of DHE in D<sub>2</sub>O and methanol-d<sub>4</sub>.

**Figure S-6.** GC-MS of propyl benzene obtained as a product from the reaction of DHE in D<sub>2</sub>O and methanol-d<sub>4</sub>.

**Figure S-7.** <sup>2</sup>H NMR spectra and GC-MS of p-cresol after reaction with Nb<sub>2</sub>O<sub>5</sub> in D<sub>2</sub>O.

**Figure S-8.** <sup>2</sup>H NMR spectrum of the products from the catalysed reaction of DHE with D<sub>2</sub> in H<sub>2</sub>O and MeOH.

**Figure S-9.** GC-TCD analysis of a typical reaction in the co-catalyst system.

### Schemes: 1

**Scheme S-1.** The mechanism of p-cresol reacting with Nb<sub>2</sub>O<sub>5</sub> in D<sub>2</sub>O.

## Tables

**Table S-1.** Time profile of co-catalyst system

| Entry          | Time (h) | Conv. (%) | Product Distribution (%) |     |     |     |    |
|----------------|----------|-----------|--------------------------|-----|-----|-----|----|
|                |          |           | 1                        | 2   | 3   | 4   | 5  |
| 1 <sup>a</sup> | 2        | 14        | -                        | -   | -   | 100 | -  |
| 2 <sup>b</sup> | 2        | 41        | -                        | -   | -   | 18  | 82 |
| 3              | 2        | 36        | 4                        | 5.9 | 9.4 | 65  | 16 |
| 4              | 4        | 100       | 35                       | 33  | 31  | -   | -  |
| 5              | 8        | 100       | 94                       | 6.4 | -   | -   | -  |
| 6 <sup>c</sup> | 12       | 100       | 100                      | -   | -   | -   | -  |

Reaction condition: DHE 0.2 mL, Ru/C 100 mg, Nb<sub>2</sub>O<sub>5</sub> 200 mg, H<sub>2</sub>O 12 mL, methanol 0.8 mL, P(H<sub>2</sub>) = 6 bar, 250 °C, 12h. <sup>a</sup> Reaction with Ru/C only. <sup>b</sup> Reaction with Nb<sub>2</sub>O<sub>5</sub> only. <sup>c</sup> The same experiment as entry 4 in Table 2.

**Table S-2.** Catalyst recyclability test

| Run            | Conv. (%) | Product Distribution (%) |    |    |    |    | Material balance (mol%) |
|----------------|-----------|--------------------------|----|----|----|----|-------------------------|
|                |           | 1                        | 2  | 3  | 4  | 5  |                         |
| 1              | 100       | 81                       | 19 | -  | -  | -  | 92                      |
| 2              | 100       | 81                       | 19 | -  | -  | -  | 94                      |
| 3              | 78.6      | 14                       | 10 | 12 | 56 | 8  | 94                      |
| 4 <sup>a</sup> | 56.3      | 27                       | 4  | 18 | 46 | 6  | 88                      |
| 5 <sup>b</sup> | 47        | 17                       | 3  | 21 | 55 | 3  | 88                      |
| 6 <sup>c</sup> | 80        | 31                       | 4  | 7  | 38 | 20 | 90                      |

Reaction condition: DHE 1 mL, Ru/C 100 mg, Nb<sub>2</sub>O<sub>5</sub> 200 mg, H<sub>2</sub>O 12 mL, methanol 1 mL, P(H<sub>2</sub>) = 6 bar, 250 °C, 16 h. Unless noted, the catalyst was washed using ethanol twice, dried in vacuum chamber at room temperature for 24 h and in oven at 120 °C for 1 h before using for next run. <sup>a</sup> Catalyst was calcinated under N<sub>2</sub> at 450 °C for another 45 min before use. <sup>b</sup> Catalyst was reduced under H<sub>2</sub>(5%)/Ar at 350 °C for another 3 h before use. <sup>c</sup> Fresh Nb<sub>2</sub>O<sub>5</sub> 0.1 g was added into the reused catalyst mixture (0.2 g left after five runs) for the Run 6.

**Table S-3.** Reaction with cyclohexanol feedstock over Ru/C or Nb<sub>2</sub>O<sub>5</sub> alone.

| Entry | Substrate                                                                         | Conv. (%) | Product Distribution (%) |              |
|-------|-----------------------------------------------------------------------------------|-----------|--------------------------|--------------|
|       |                                                                                   |           | <b>1</b>                 | <b>other</b> |
| 1     | 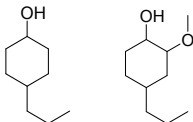 | 99        | 100                      | 0            |
| 2     |                                                                                   | 62        | 14.5                     | 85.5         |

Reaction condition: propyl cyclohexanol and 2-methoxy-4-propylcyclohexanol mixture (1:1) 0.4 mL, Ru/C 100 mg (entry 1) or Nb<sub>2</sub>O<sub>5</sub> 200 mg (entry 2), H<sub>2</sub>O 12 mL, methanol 0.8 mL, initial P(H<sub>2</sub>) = 6 bar, 250 °C, 12 h.

## Figures and Schemes

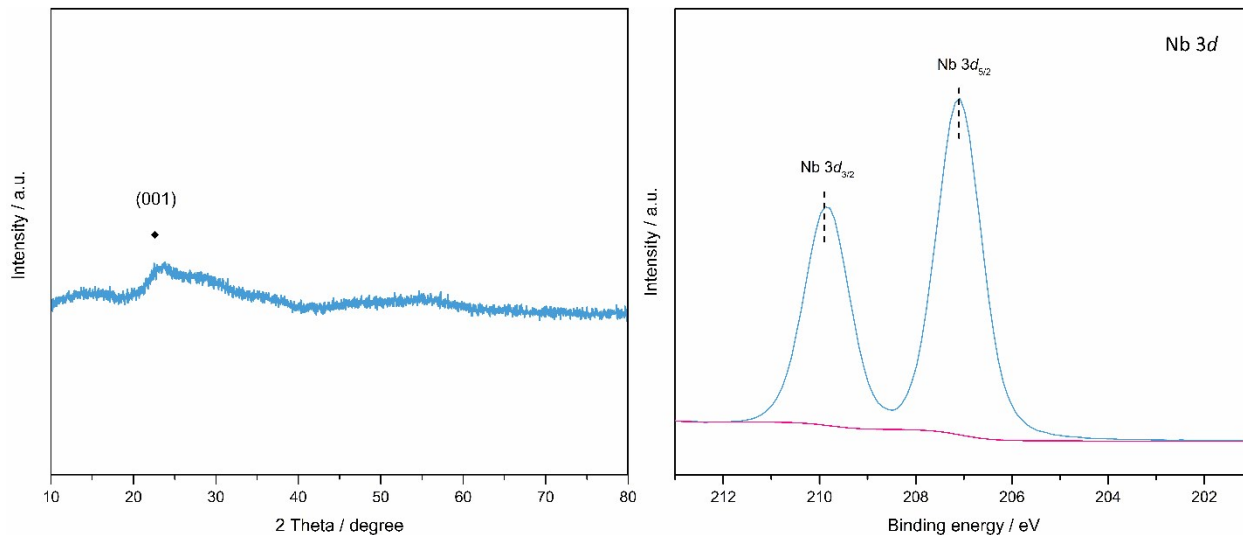

**Figure S-1.** XRD pattern (left) and XPS analysis (right) of Nb<sub>2</sub>O<sub>5</sub> catalyst. According to XRD pattern of Nb<sub>2</sub>O<sub>5</sub> (left), only one broad diffraction peak located at about 22.7° is observed, which corresponds to the facet (001). No sharp peak is observed, which suggests that the synthesized Nb<sub>2</sub>O<sub>5</sub> has the amorphous structure. XPS analysis was also performed to obtain the oxidation state (right). The catalyst shows the typical Nb 3d<sub>3/2</sub> (209.9 eV) and Nb 3d<sub>5/2</sub> (207.1 eV) peaks of Nb<sup>5+</sup>.<sup>1</sup> No other peaks were obtained.

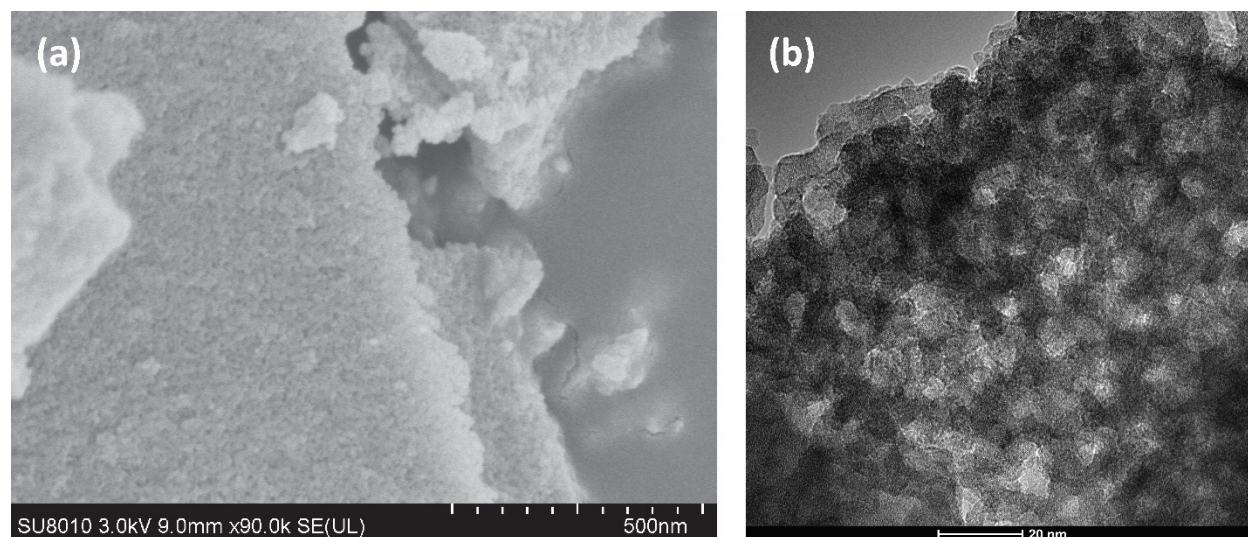

**Figure S-2.** SEM (a) and TEM (b) images of Nb<sub>2</sub>O<sub>5</sub> catalyst. According to the SEM image, the bulk-shape particles of synthesized Nb<sub>2</sub>O<sub>5</sub> are not the crystalline form. Numerous pores are evenly distributed on the top and cross section of the catalyst evenly. From the TEM image, the inner pores of Nb<sub>2</sub>O<sub>5</sub> can be observed more clearly. The pores are not regular but has relatively consistent pore size that is around 5 nm. Combining with the XRD result, the synthesized Nb<sub>2</sub>O<sub>5</sub> is an amorphous mesoporous solid.

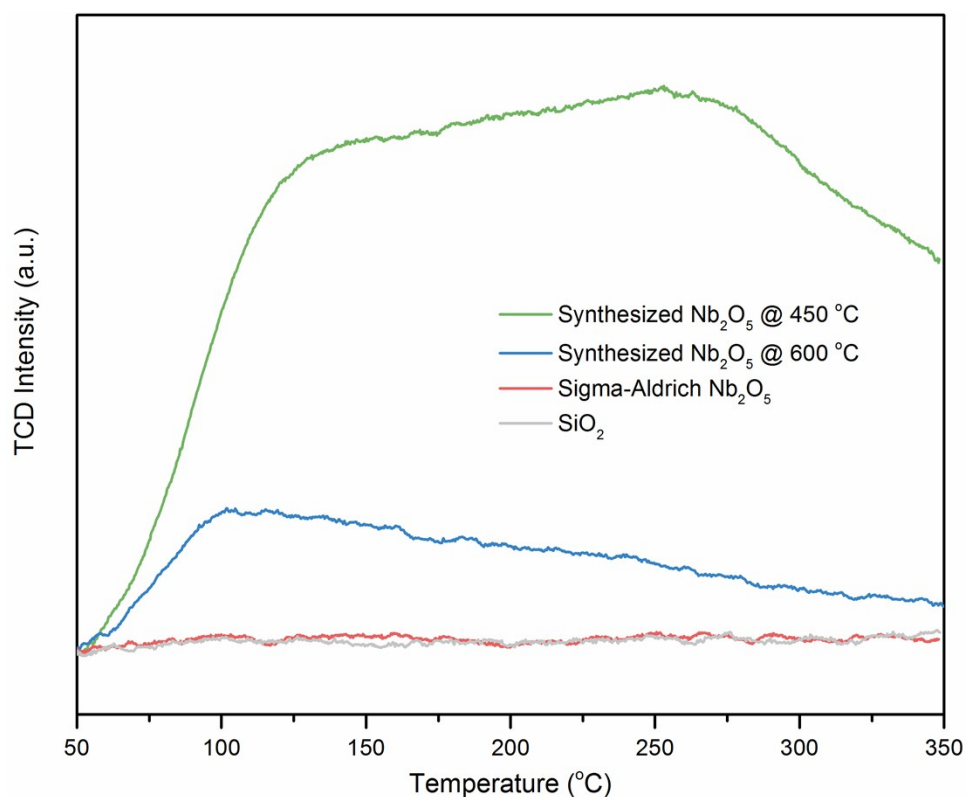

**Figure S-3.**  $\text{NH}_3$ -TPD profiles of different  $\text{Nb}_2\text{O}_5$  catalysts. The  $\text{Nb}_2\text{O}_5$  was prepared by using niobium (V) chloride and CTAB in a Teflon lined autoclave and calcinated at 450 °C and 600 °C, respectively.  $\text{Nb}_2\text{O}_5$  purchased from Sigma-Aldrich used as is.  $\text{SiO}_2$  has no acid sites and was analyzed for comparison. 0.2600 g  $\text{Nb}_2\text{O}_5$  prepared at 450 °C, 0.1964 g  $\text{Nb}_2\text{O}_5$  prepared at 600 °C, 0.2210 g purchased  $\text{Nb}_2\text{O}_5$ , and 0.2173 g  $\text{SiO}_2$  samples were loaded for  $\text{NH}_3$ -TPD analysis. The ammonia adsorption was determined in term of mmol of  $\text{NH}_3$  per gram of loaded sample.

The acid property of  $\text{Nb}_2\text{O}_5$  catalyst is sensitive to the calcination temperature. According to the figure,  $\text{Nb}_2\text{O}_5$  calcinated at 450 °C adsorbs the largest amount of ammonia among other samples which indicates the 450 °C  $\text{Nb}_2\text{O}_5$  has the most abundant acid sites. When the calcination temperature increased to 600 °C, the acid sites reduced dramatically. And the purchased  $\text{Nb}_2\text{O}_5$  from Sigma-Aldrich has been reported to be calcinated at 1000 °C almost has no acid sites comparing to  $\text{SiO}_2$ .<sup>2</sup> According to our results, abundant acid sites of  $\text{Nb}_2\text{O}_5$  are vital to our HDO reactions. From entries 1 and 2 in Table 3,  $\text{Nb}_2\text{O}_5$  calcinated at 450 °C promotes the hydrolysis of catechol (**5**) and dehydroxylation to phenol (**4**) but the purchased  $\text{Nb}_2\text{O}_5$  shows no activity.

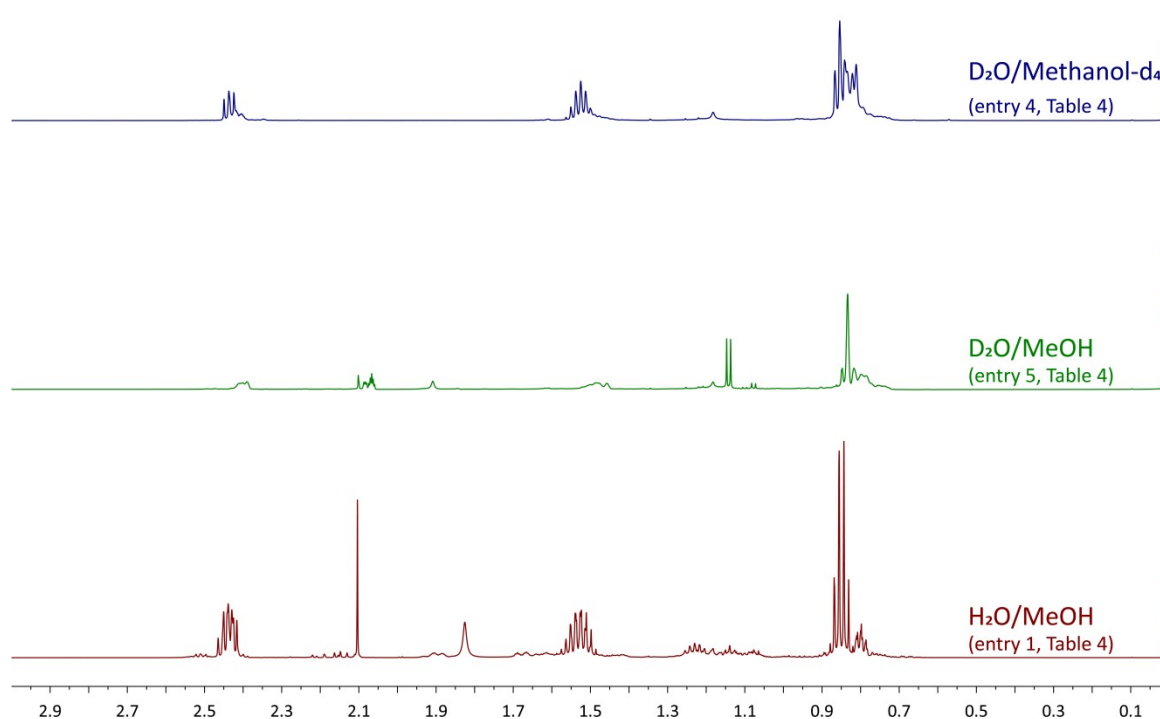

**Figure S-4.**  $^1\text{H}$  NMR in the aliphatic region of the products obtained after DHE reactions in  $\text{D}_2\text{O}$ /methanol- $\text{d}_4$  (top, entry 4 in Table 4)  $\text{D}_2\text{O}$ /MeOH (middle, entry 5 in Table 4) and  $\text{H}_2\text{O}$ /MeOH (bottom, entry 2 in Table 4). Conditions: DHE 0.2 mL, Ru/C 100 mg,  $\text{Nb}_2\text{O}_5$  200 mg, water 12 mL, methanol 0.8 mL, purged with  $\text{H}_2$  and vented to  $P(\text{H}_2) = 1$  bar,  $250^\circ\text{C}$ , 12 h reaction time. For the entry 4 in Table 4 (top), the reaction time was 24 h; for the entry 1 in Table 4 (bottom), 0.4 mL MeOH was used.

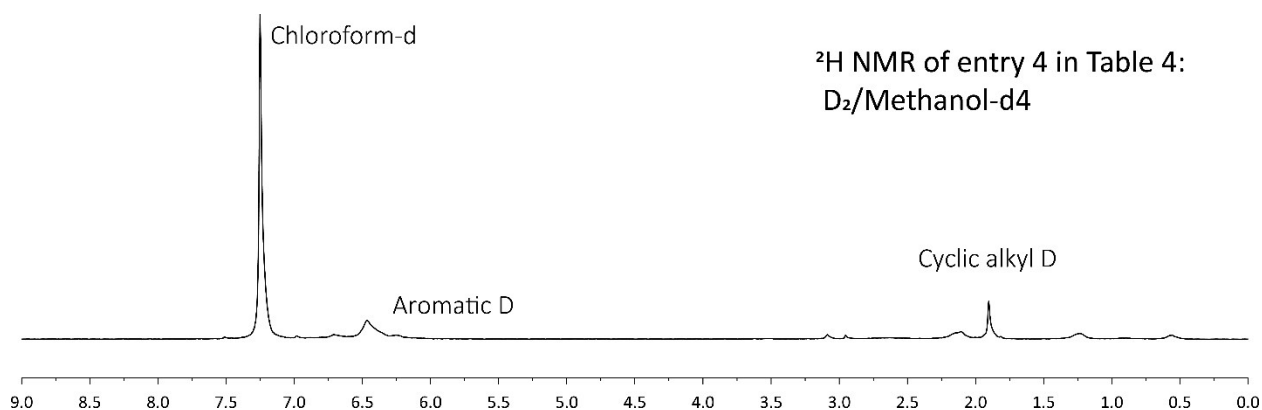

**Figure S-5.**  $^2\text{H}$  NMR spectrum of products obtained from the reaction of DHE in  $\text{D}_2\text{O}$  and methanol- $\text{d}_4$ . Conditions: DHE 0.2 mL, Ru/C 100 mg,  $\text{Nb}_2\text{O}_5$  200 mg,  $\text{D}_2\text{O}$  12 mL, methanol- $\text{d}_4$  0.8 mL, purged with  $\text{H}_2$  and vented to  $P(\text{H}_2) = 1$  bar,  $250^\circ\text{C}$ , 24 h reaction time.

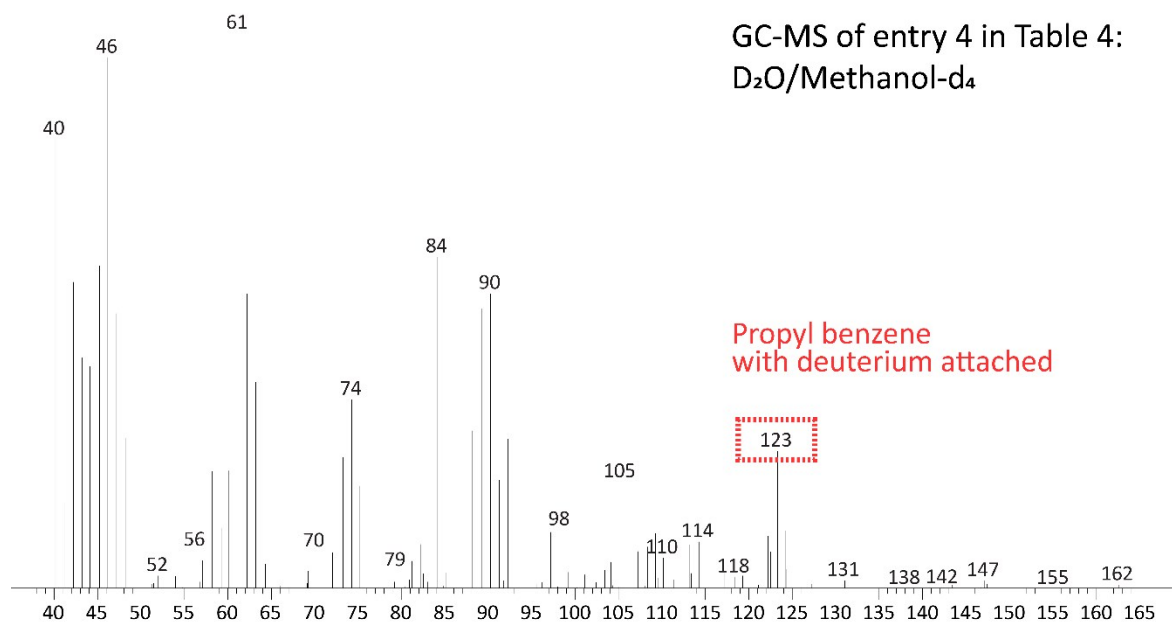

**Figure S-6.** GC-MS of propyl benzene obtained from the reaction of DHE in D<sub>2</sub>O and methanol-d<sub>4</sub>. Conditions: DHE 0.2 mL, Ru/C 100 mg, Nb<sub>2</sub>O<sub>5</sub> 200 mg, D<sub>2</sub>O 12 mL, methanol-d<sub>4</sub> 0.8 mL, purged with H<sub>2</sub> and vented to P(H<sub>2</sub>) = 1 bar, 250 °C, 24 h reaction time.

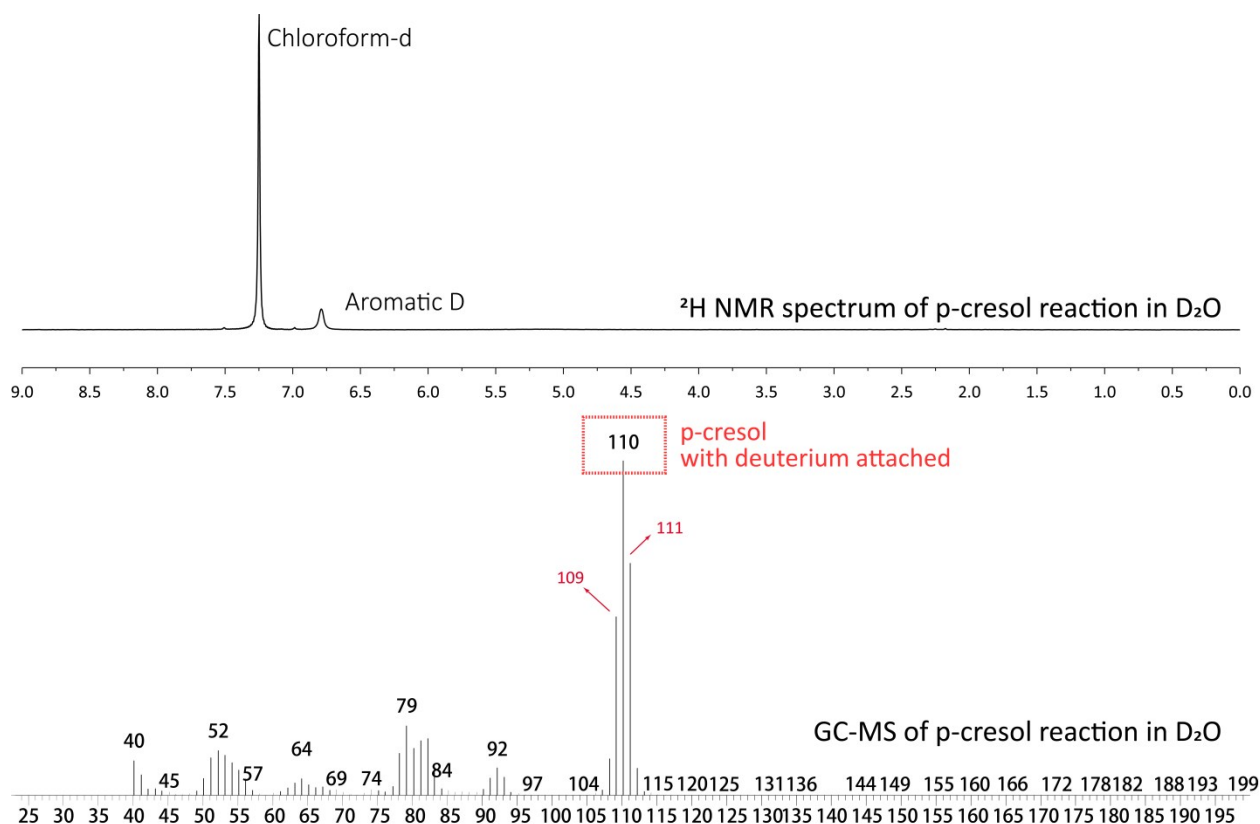

**Figure S-7.**  $^2\text{H}$  NMR (above) and GC-MS (bottom) spectra of p-cresol after reaction with  $\text{Nb}_2\text{O}_5$  in  $\text{D}_2\text{O}$ . Conditions: p-cresol 0.2 mL,  $\text{Nb}_2\text{O}_5$  200 mg,  $\text{D}_2\text{O}$  12 mL,  $P(\text{H}_2) = 6$  bar,  $250^\circ\text{C}$ , 12 h reaction time. No HDO product was observed after reaction. However, the molecular weight of p-cresol was detected to be M/e 109, 110, and 111 by GC-MS. This suggests that up to three aromatic hydrogens on p-cresol exchanged with the solvent  $\text{D}_2\text{O}$  during the reaction. The aromatic deuteriums detected upon recording the  $^2\text{H}$  NMR spectrum of the p-cresol after reaction, can be explained by the tautomerization mechanism (Scheme S-1).

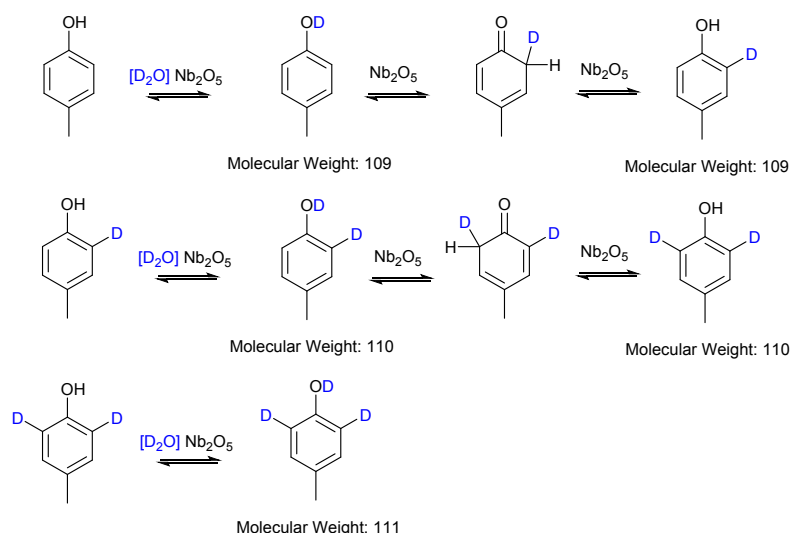

**Scheme S-1.** The mechanism of p-cresol reaction with  $\text{Nb}_2\text{O}_5$  in  $\text{D}_2\text{O}$ . The deuterium from  $\text{D}_2\text{O}$  could transfer to aromatic ring through tautomerization catalysed by  $\text{Nb}_2\text{O}_5$ . This Scheme shows the possible structures and molecular weight of p-cresol after isotopic reaction with  $\text{Nb}_2\text{O}_5$  in  $\text{D}_2\text{O}$  in agreement with the GC/MS and  $^2\text{H}$  NMR results.

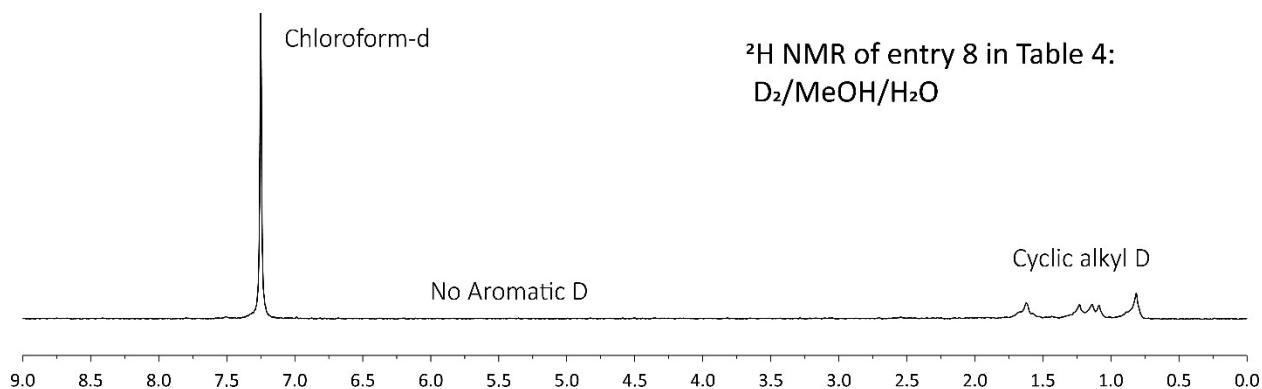

**Figure S-8.**  $^2\text{H}$  NMR spectrum of the products from the catalysed reaction of DHE with  $\text{D}_2$  in  $\text{H}_2\text{O}$  and MeOH. Conditions: DHE 0.2 mL, Ru/C 100 mg,  $\text{Nb}_2\text{O}_5$  200 mg,  $\text{H}_2\text{O}$  12 mL, MeOH 0.8 mL,  $P(\text{D}_2)$  at RT = 6 bar,  $250^\circ\text{C}$ , 24 h reaction time.

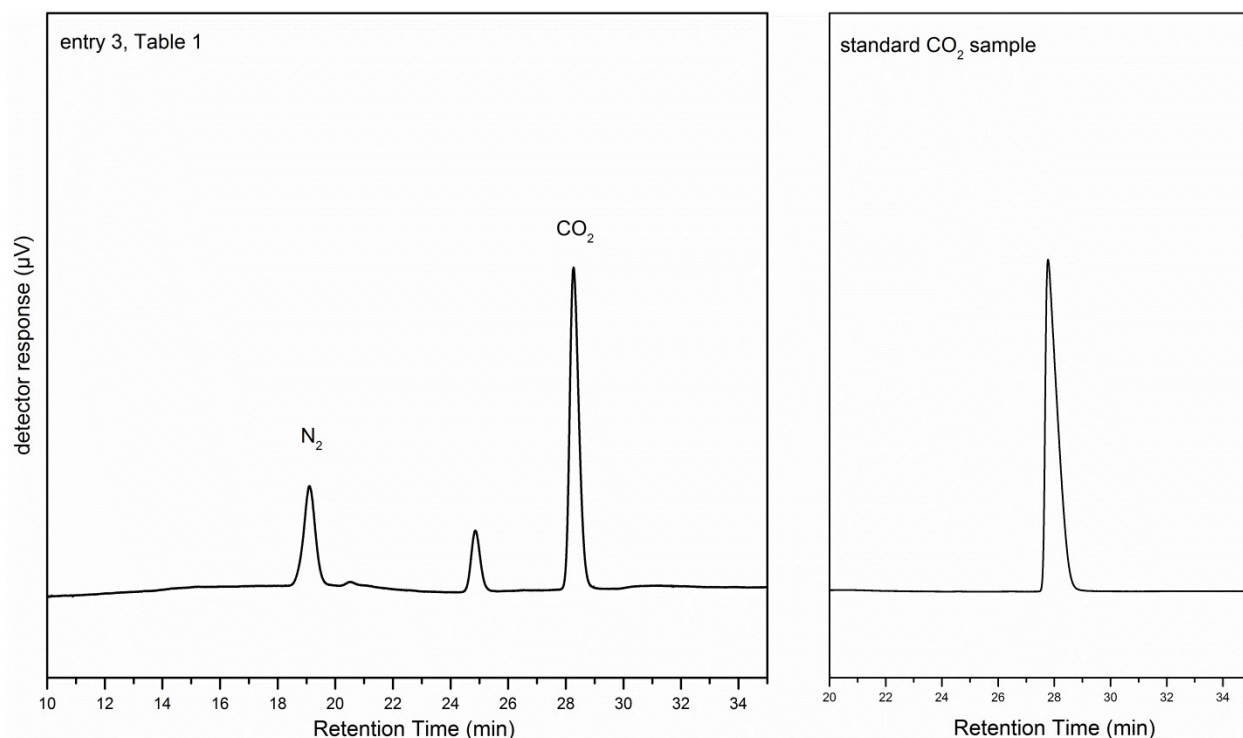

**Figure S-9.** GC-TCD analysis of a typical reaction in the co-catalyst system (entry 3, Table 1). The gas phase products were collected after reaction (left). A standard CO<sub>2</sub> sample was obtained and analyzed for peak assignment by its retention time at 28.2 to 28.5 min (right). Reaction condition: DHE 0.2 mL, Ru/C 100 mg, Nb<sub>2</sub>O<sub>5</sub> 200 mg, H<sub>2</sub>O 12 mL, methanol 0.8 mL, P(H<sub>2</sub>) = 1 bar, 250 °C, 12 h. CO<sub>2</sub> gas was detected as the main product in gas phase after the HDO reaction. It was evident that catalytic reforming of methanol occurs in this co-catalyst system.

## References

1. Özer, N.; Rubin, M. D.; Lampert, C. M., Optical and electrochemical characteristics of niobium oxide films prepared by sol-gel process and magnetron sputtering A comparison. *Solar Energy Materials and Solar Cells* **1996**, 40 (4), 285-296.
2. Chan, X. J.; Pu, T. C.; Chen, X. Y.; James, A.; Lee, J.; Parise, J. B.; Kim, D. H.; Kim, T., Effect of niobium oxide phase on the furfuryl alcohol dehydration. *Catal Commun* **2017**, 97, 65-69.
